# Supplementary material for: Striatal dynamics explain duration judgments
Source: eLife journal article supplement (doi:10.7554/elife.11386), 2015-12-07

**a**

example frames

short stimuli

**0.60 s**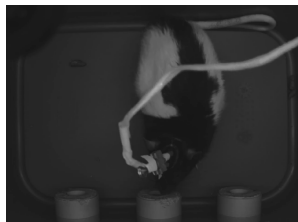

long stimuli

**2.40 s**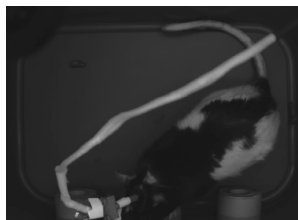**b**

superimposed trials split by stimulus

**0.60 s**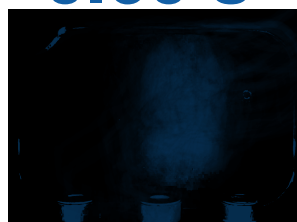**1.05 s**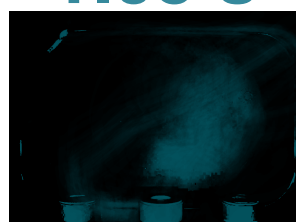**1.26 s**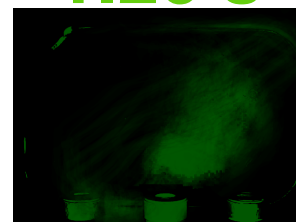**1.38 s**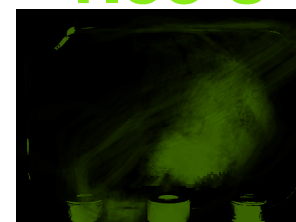**2.40 s**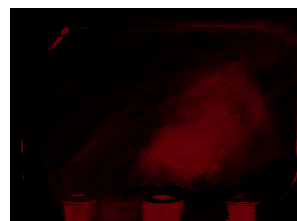**1.95 s**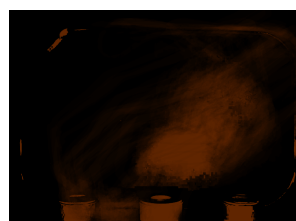**1.74 s**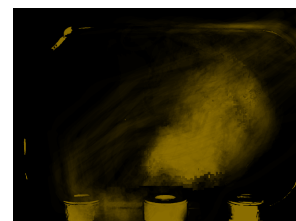**1.62 s**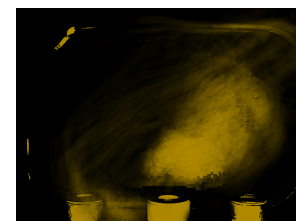

easy stimuli

hard stimuli

**c**

all trials (n = 339)

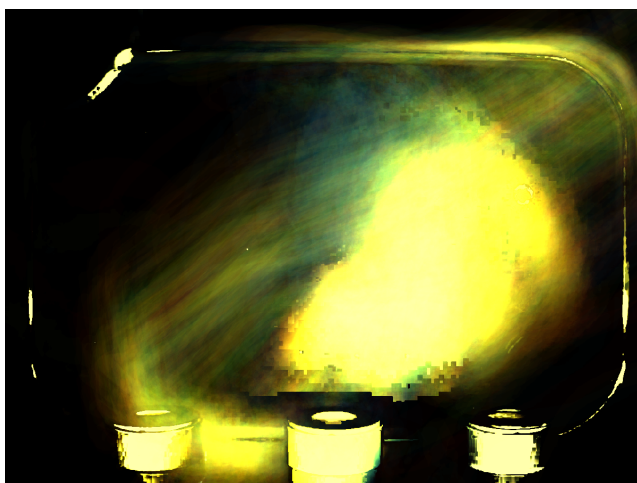**d**

excluding easiest stimuli [0.60;2.40]

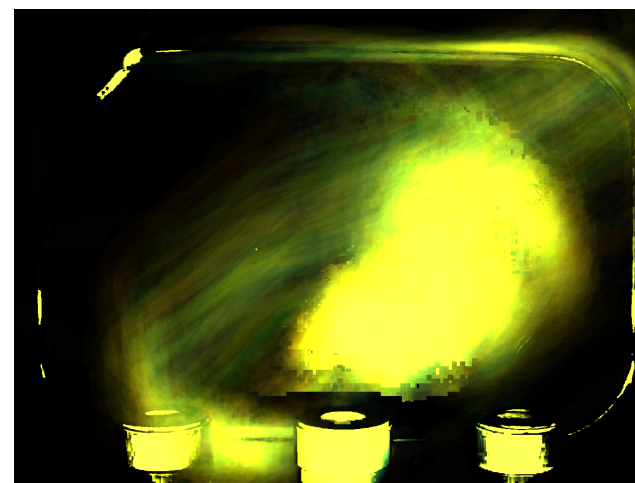

Supplement: supp [file elife_poa_e11386_Figure_3_figure_supplement_1.pdf › elife_poa_e11386_Figure_3_figure_supplement_1.pdf]
