# Supplementary figures and images for: Striatal dynamics explain duration judgments
Source: eLife journal article supplement (doi:10.7554/elife.11386), 2015-12-07

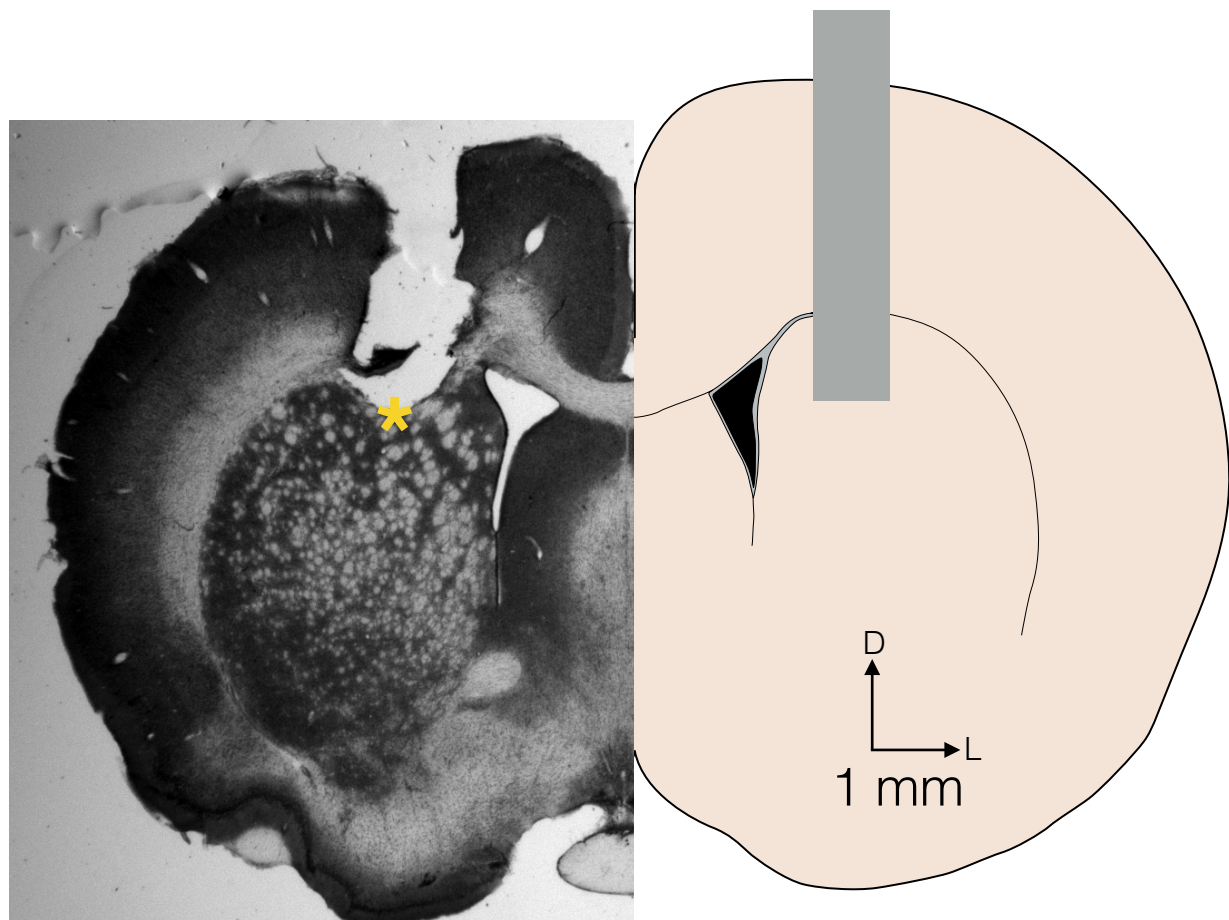

0.84mm Bregma

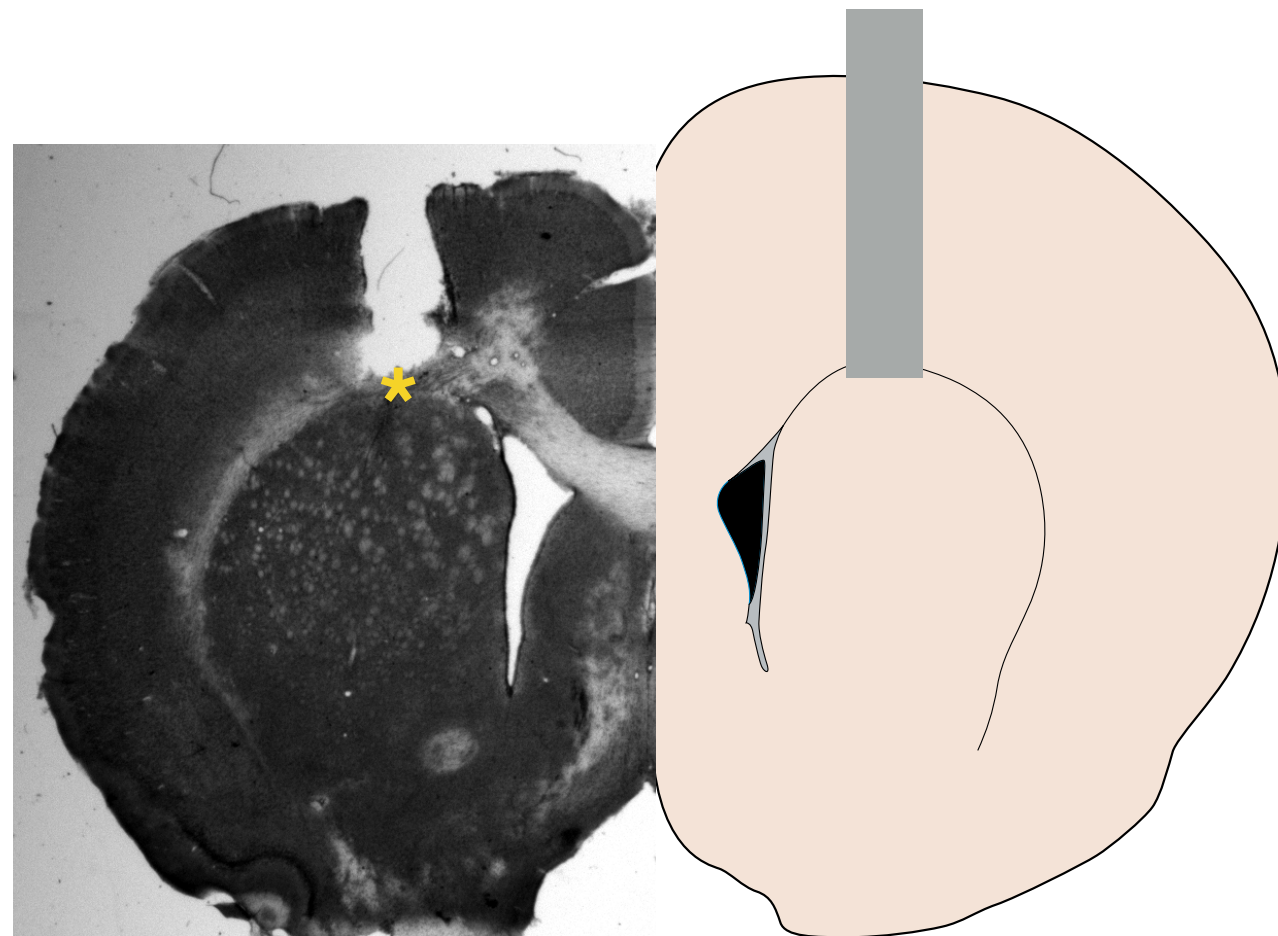

1.68mm Bregma

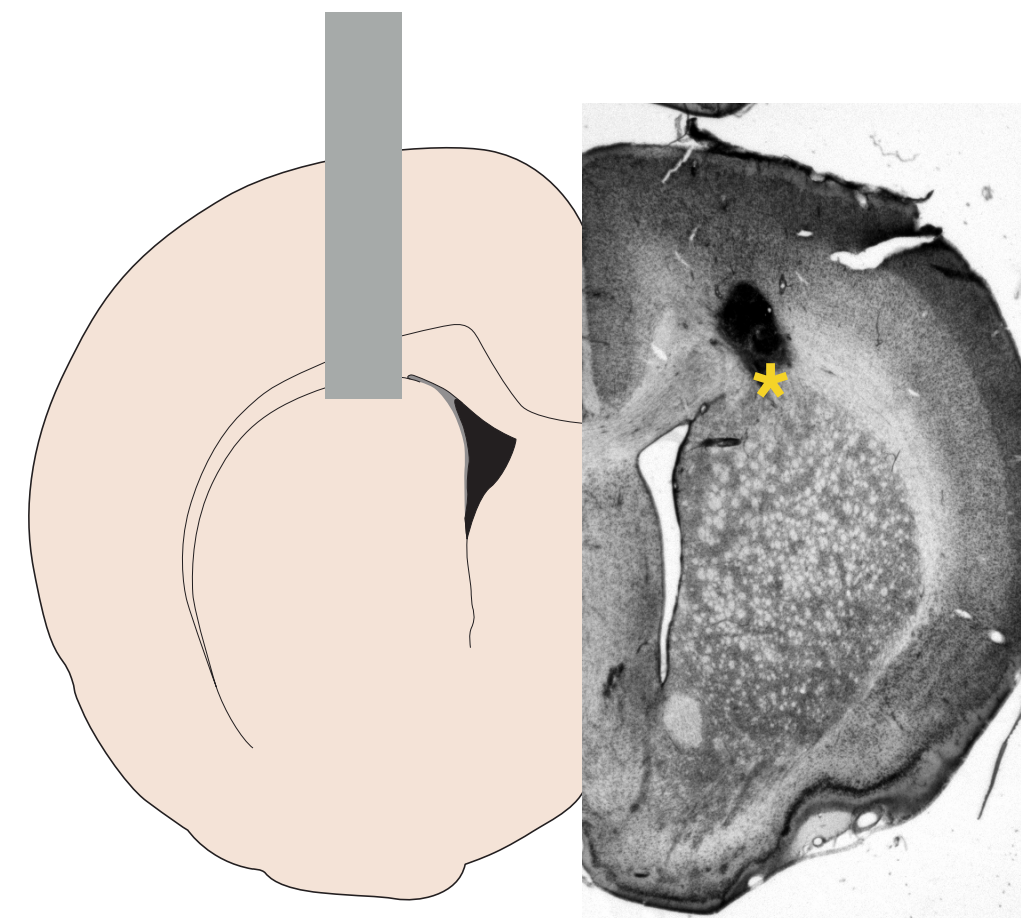

0.60mm Bregma

Supplement: supp [file elife_poa_e11386_Figure_1_figure_supplement_1.pdf › elife_poa_e11386_Figure_1_figure_supplement_1.pdf]

**a**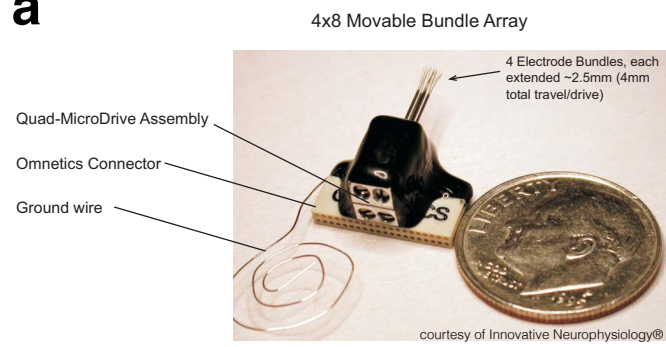**b**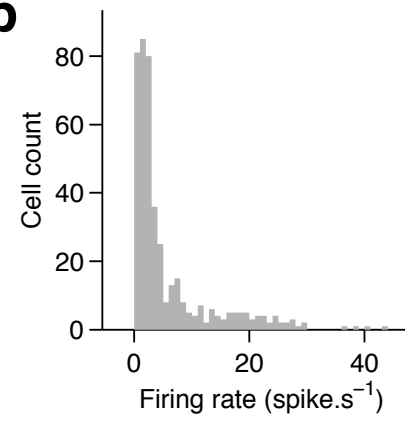**c**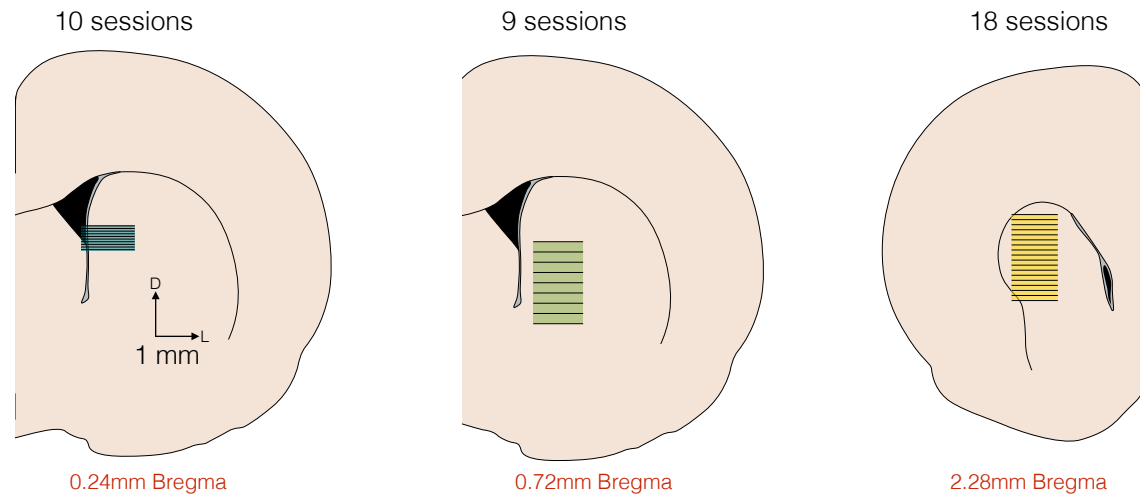

Supplement: supp [file elife_poa_e11386_Figure_2_figure_supplement_1.pdf › elife_poa_e11386_Figure_2_figure_supplement_1.pdf]

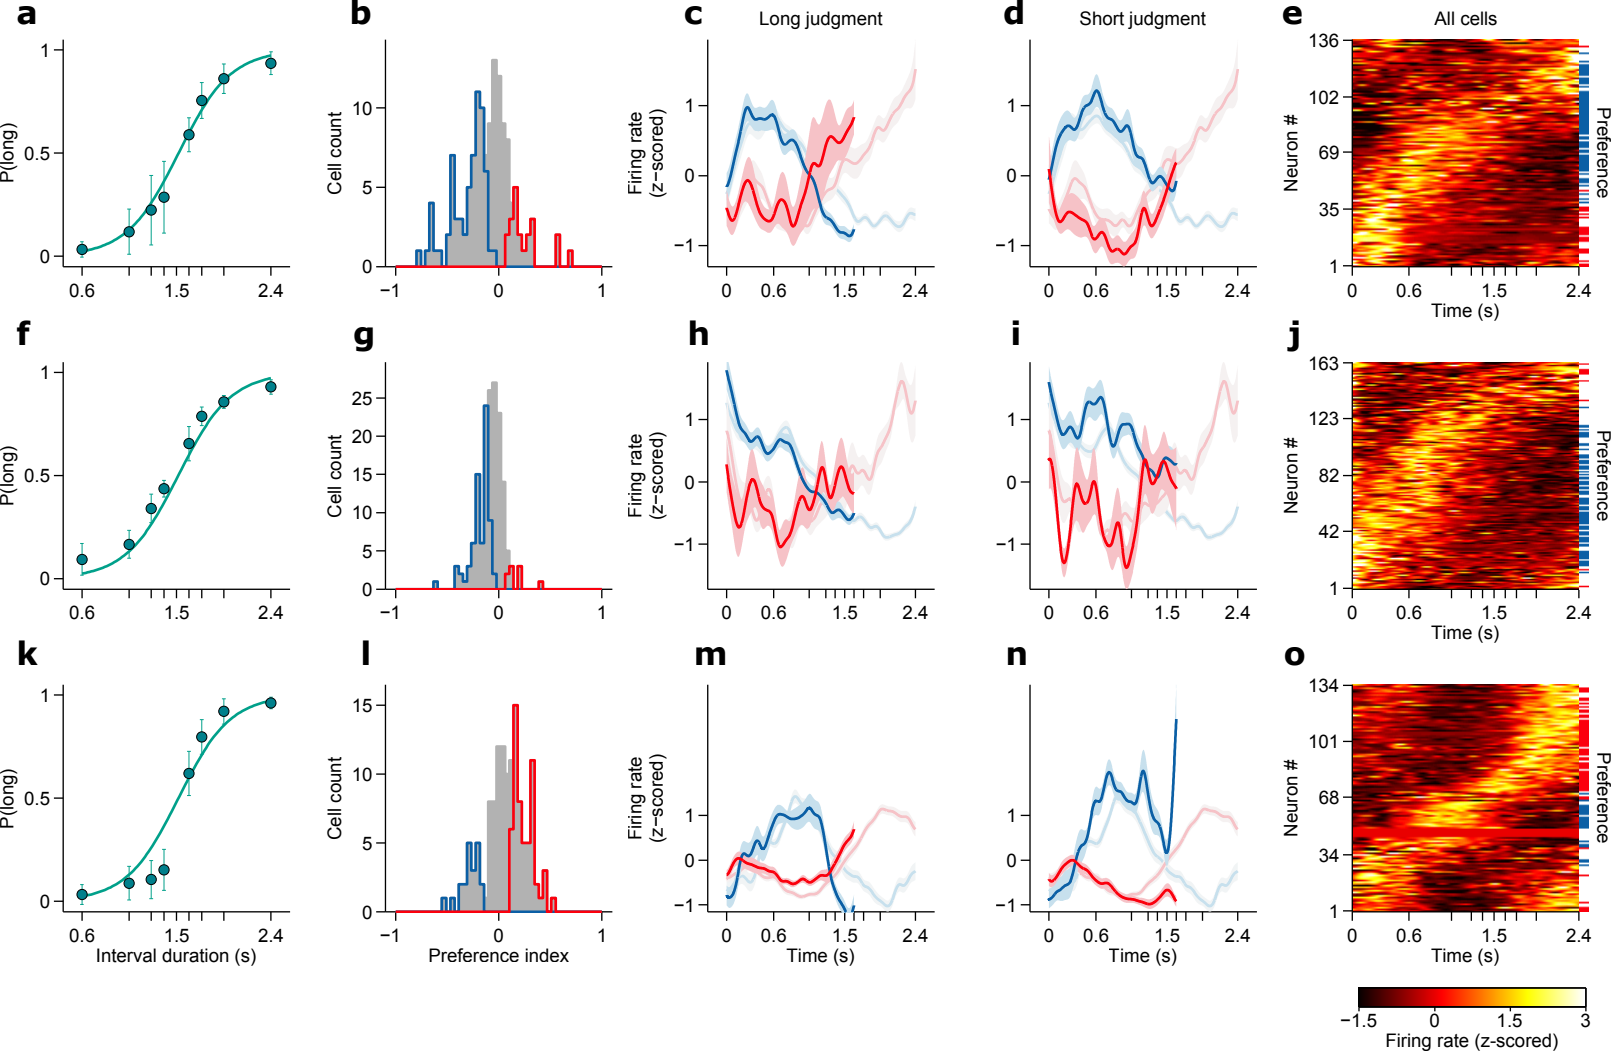

Supplement: supp [file elife_poa_e11386_Figure_2_figure_supplement_2.pdf › elife_poa_e11386_Figure_2_figure_supplement_2.pdf]

**a**

Frames taken  
at interval offset

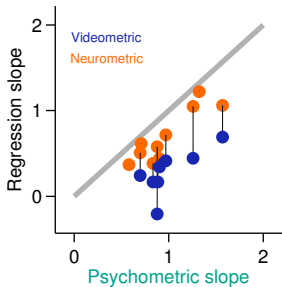**b**

Frames taken  
at time of choice

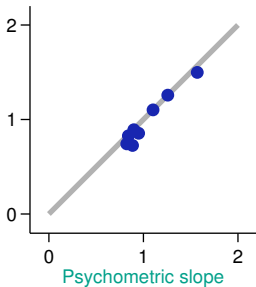

Supplement: supp [file elife_poa_e11386_Figure_3_figure_supplement_2.pdf › elife_poa_e11386_Figure_3_figure_supplement_2.pdf]

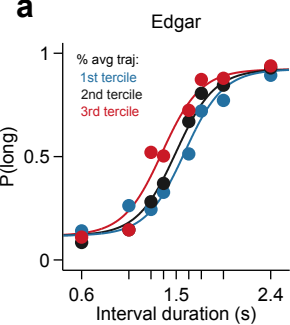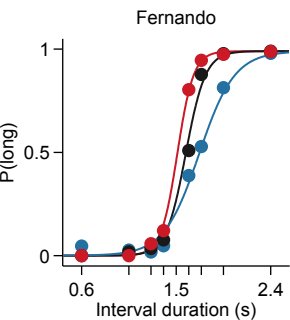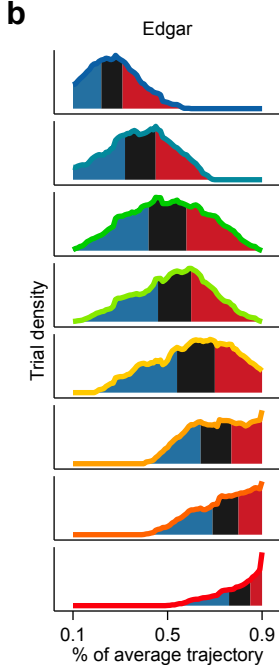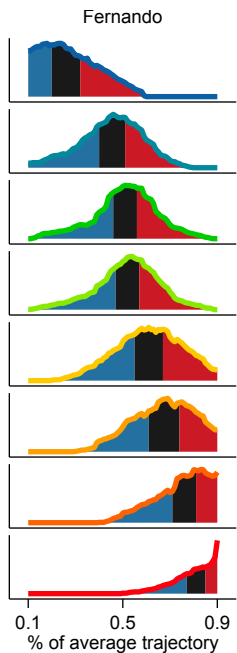

Supplement: supp [file elife_poa_e11386_Figure_3_figure_supplement_3.pdf › elife_poa_e11386_Figure_3_figure_supplement_3.pdf]

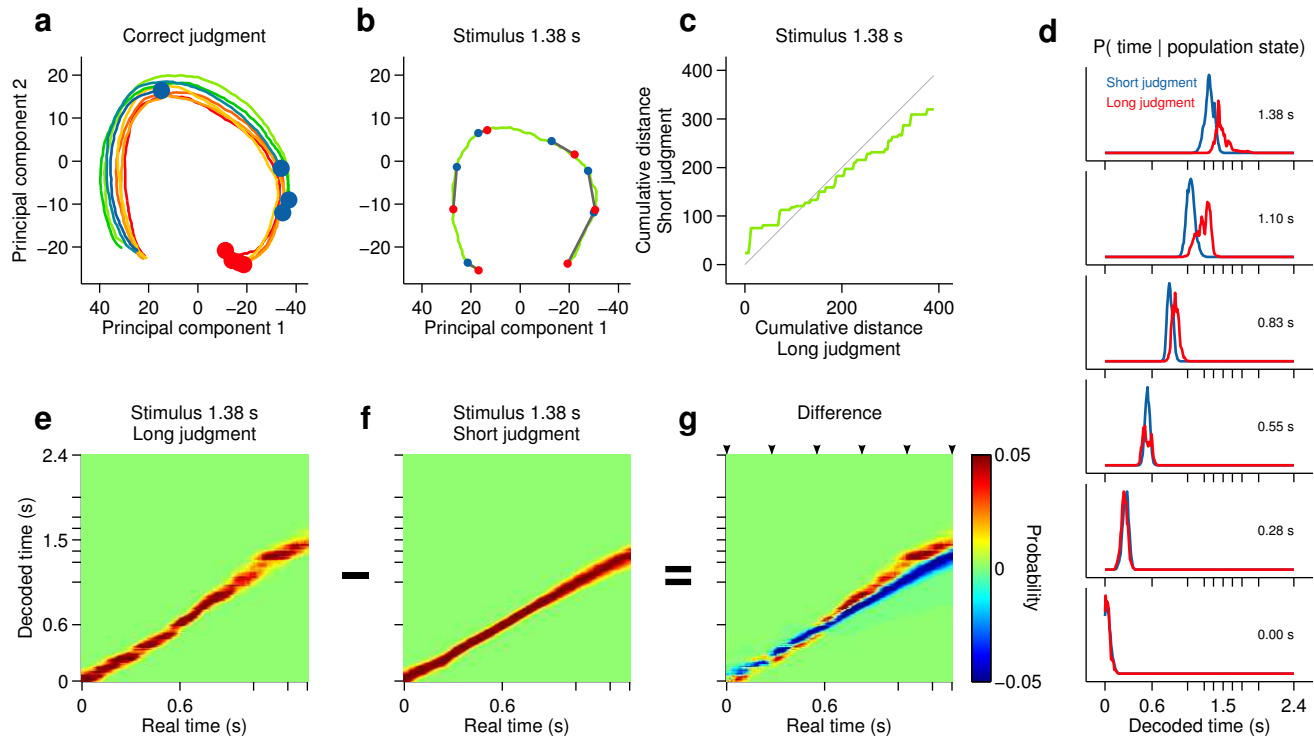

Supplement: supp [file elife_poa_e11386_Figure_4_figure_supplement_1.pdf › elife_poa_e11386_Figure_4_figure_supplement_1.pdf]

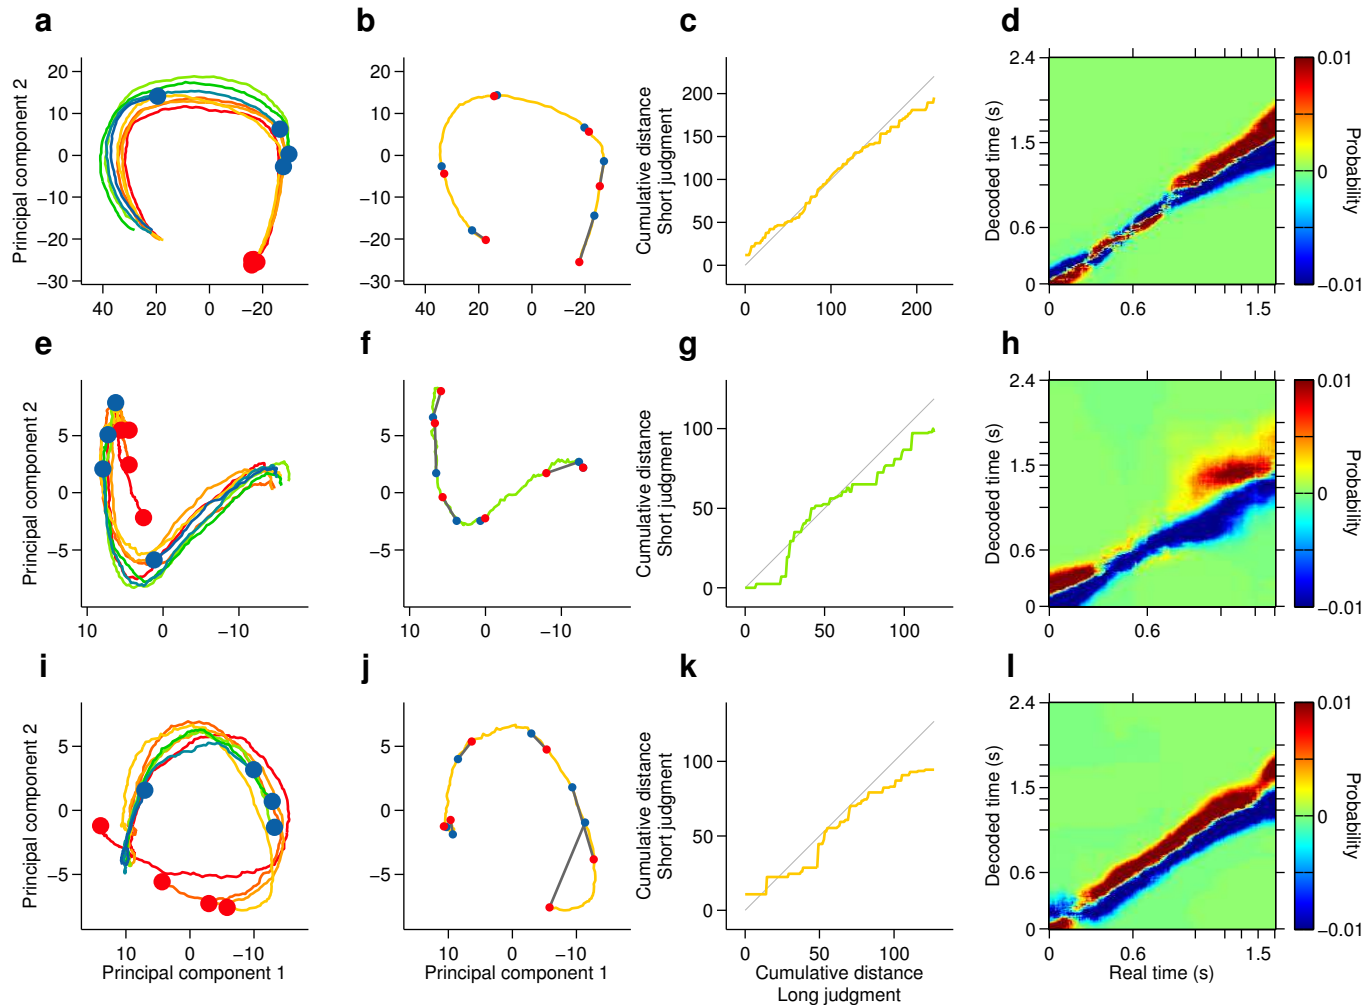

Supplement: supp [file elife_poa_e11386_Figure_4_figure_supplement_2.pdf › elife_poa_e11386_Figure_4_figure_supplement_2.pdf]
